# Supplementary material for: Kenoargentotetrahedrite-(Zn), [Ag6]4+(Cu4Zn2)Sb4S12□, a new member of the tetrahedrite group from the Yindongpo Au deposit, China
Source: Copernicus journal article supplement (doi:10.5194/ejm-36-397-2024), 2024-05-03

## checkCIF/PLATON report

Structure factors have been supplied for datablock(s) kenoargentotetrahedrite-Zn

THIS REPORT IS FOR GUIDANCE ONLY. IF USED AS PART OF A REVIEW PROCEDURE FOR PUBLICATION, IT SHOULD NOT REPLACE THE EXPERTISE OF AN EXPERIENCED CRYSTALLOGRAPHIC REFEREE.

No syntax errors found.      CIF dictionary      Interpreting this report

### Datablock: kenoargentotetrahedrite-Zn

---

Bond precision:      = 0.0000 Å

Wavelength=0.71073

Cell:                      a=10.4624(4)                      b=10.4624(4)                      c=10.4624(4)

                            alpha=90

                            beta=90

                            gamma=90

Temperature:            293 K

|                        | Calculated                                           | Reported                                             |
|------------------------|------------------------------------------------------|------------------------------------------------------|
| Volume                 | 1145.23(13)                                          | 1145.23(13)                                          |
| Space group            | I -4 3 m                                             | I -4 3 m                                             |
| Hall group             | I -4 2 3                                             | I -4 2 3                                             |
| Moiety formula         | Ag7.56 As0.56 Cu12.24<br>Fe1.68 S24.74 Sb7.44 Zn2.52 | Ag3.78 As0.28 Cu6.12 Fe0.84<br>S12.372 Sb3.72 Zn1.26 |
| Sum formula            | Ag7.56 As0.56 Cu12.24<br>Fe1.68 S24.74 Sb7.44 Zn2.52 | Ag3.78 As0.28 Cu6.12 Fe0.84<br>S12.37 Sb3.72 Zn1.26  |
| Mr                     | 3592.97                                              | 1796.36                                              |
| Dx, g cm <sup>-3</sup> | 5.210                                                | 5.209                                                |
| Z                      | 1                                                    | 2                                                    |
| Mu (mm <sup>-1</sup> ) | 16.332                                               | 16.332                                               |
| F000                   | 1623.3                                               | 1623.3                                               |
| F000'                  | 1620.85                                              |                                                      |
| h, k, lmax             | 13, 13, 13                                           | 11, 10, 13                                           |
| Nref                   | 284[ 164]                                            | 294                                                  |
| Tmin, Tmax             | 0.892, 0.922                                         | 0.911, 1.000                                         |
| Tmin'                  | 0.892                                                |                                                      |

Correction method= # Reported T Limits: Tmin=0.911 Tmax=1.000

AbsCorr = MULTII-SCAN

Data completeness= 1.79/1.04

Theta(max)= 28.235

R(reflections)= 0.0310( 274)

wR2(reflections)=  
0.0595( 294)

S = 1.103

Npar= 18

---

The following ALERTS were generated. Each ALERT has the format

**test-name\_ALERT\_alert-type\_alert-level.**

Click on the hyperlinks for more details of the test.

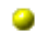

### Alert level C

ABSTY02\_ALERT\_1\_C An \_exptl\_absorpt\_correction\_type has been given without  
a literature citation. This should be contained in the  
\_exptl\_absorpt\_process\_details field.

Absorption correction given as multi-scan

|                   |                                                  |              |
|-------------------|--------------------------------------------------|--------------|
| PLAT042_ALERT_1_C | Calc. and Reported MoietyFormula Strings Differ  | Please Check |
| PLAT077_ALERT_4_C | Unitcell Contains Non-integer Number of Atoms .. | Please Check |
| PLAT972_ALERT_2_C | Check Calcd Resid. Dens. 0.60Ang From Cu2        | -1.51 eA-3   |
| PLAT972_ALERT_2_C | Check Calcd Resid. Dens. 0.60Ang From Cu2        | -1.51 eA-3   |
| PLAT973_ALERT_2_C | Check Calcd Positive Resid. Density on Ag2       | 1.14 eA-3    |
| PLAT973_ALERT_2_C | Check Calcd Positive Resid. Density on Cu2       | 1.14 eA-3    |

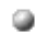

### Alert level G

|                   |                                                  |             |
|-------------------|--------------------------------------------------|-------------|
| PLAT004_ALERT_5_G | Polymeric Structure Found with Maximum Dimension | 2 Info      |
| PLAT045_ALERT_1_G | Calculated and Reported Z Differ by a Factor ... | 0.500 Check |
| PLAT083_ALERT_2_G | SHELXL Second Parameter in WGHT Unusually Large  | 19.97 Why ? |
| PLAT168_ALERT_4_G | The CIF-Embedded .res File Contains EXYZ Records | 3 Report    |
| PLAT171_ALERT_4_G | The CIF-Embedded .res File Contains EADP Records | 3 Report    |
| PLAT199_ALERT_1_G | Reported _cell_measurement_temperature ..... (K) | 293 Check   |
| PLAT200_ALERT_1_G | Reported _diffrn_ambient_temperature ..... (K)   | 293 Check   |
| PLAT300_ALERT_4_G | Atom Site Occupancy of Sb1 Constrained at        | 0.93 Check  |
| PLAT300_ALERT_4_G | Atom Site Occupancy of Ag2 Constrained at        | 0.63 Check  |
| PLAT300_ALERT_4_G | Atom Site Occupancy of As1 Constrained at        | 0.07 Check  |
| PLAT300_ALERT_4_G | Atom Site Occupancy of Cu1 Constrained at        | 0.65 Check  |
| PLAT300_ALERT_4_G | Atom Site Occupancy of Zn1 Constrained at        | 0.21 Check  |
| PLAT300_ALERT_4_G | Atom Site Occupancy of Cu2 Constrained at        | 0.37 Check  |
| PLAT300_ALERT_4_G | Atom Site Occupancy of Fe1 Constrained at        | 0.14 Check  |
| PLAT301_ALERT_3_G | Main Residue Disorder .....(Resd 1 )             | 85% Note    |
| PLAT811_ALERT_5_G | No ADDSYM Analysis: Too Many Excluded Atoms .... | ! Info      |
| PLAT883_ALERT_1_G | No Info/Value for _atom_sites_solution_primary . | Please Do ! |
| PLAT950_ALERT_5_G | Calculated (ThMax) and CIF-Reported Hmax Differ  | 2 Units     |
| PLAT951_ALERT_5_G | Calculated (ThMax) and CIF-Reported Kmax Differ  | 3 Units     |
| PLAT996_ALERT_1_G | Non-Standard SHELXL LIST 4 Style FCF Supplied .. | ! Check     |

---

0 **ALERT level A** = Most likely a serious problem - resolve or explain  
0 **ALERT level B** = A potentially serious problem, consider carefully  
7 **ALERT level C** = Check. Ensure it is not caused by an omission or oversight  
20 **ALERT level G** = General information/check it is not something unexpected

7 ALERT type 1 CIF construction/syntax error, inconsistent or missing data  
5 ALERT type 2 Indicator that the structure model may be wrong or deficient  
1 ALERT type 3 Indicator that the structure quality may be low  
10 ALERT type 4 Improvement, methodology, query or suggestion  
4 ALERT type 5 Informative message, check

---

---

It is advisable to attempt to resolve as many as possible of the alerts in all categories. Often the minor alerts point to easily fixed oversights, errors and omissions in your CIF or refinement strategy, so attention to these fine details can be worthwhile. In order to resolve some of the more serious problems it may be necessary to carry out additional measurements or structure refinements. However, the purpose of your study may justify the reported deviations and the more serious of these should normally be commented upon in the discussion or experimental section of a paper or in the "special\_details" fields of the CIF. checkCIF was carefully designed to identify outliers and unusual parameters, but every test has its limitations and alerts that are not important in a particular case may appear. Conversely, the absence of alerts does not guarantee there are no aspects of the results needing attention. It is up to the individual to critically assess their own results and, if necessary, seek expert advice.

### **Publication of your CIF in IUCr journals**

A basic structural check has been run on your CIF. These basic checks will be run on all CIFs submitted for publication in IUCr journals (*Acta Crystallographica*, *Journal of Applied Crystallography*, *Journal of Synchrotron Radiation*); however, if you intend to submit to *Acta Crystallographica Section C* or *E* or *IUCrData*, you should make sure that full publication checks are run on the final version of your CIF prior to submission.

### **Publication of your CIF in other journals**

Please refer to the *Notes for Authors* of the relevant journal for any special instructions relating to CIF submission.

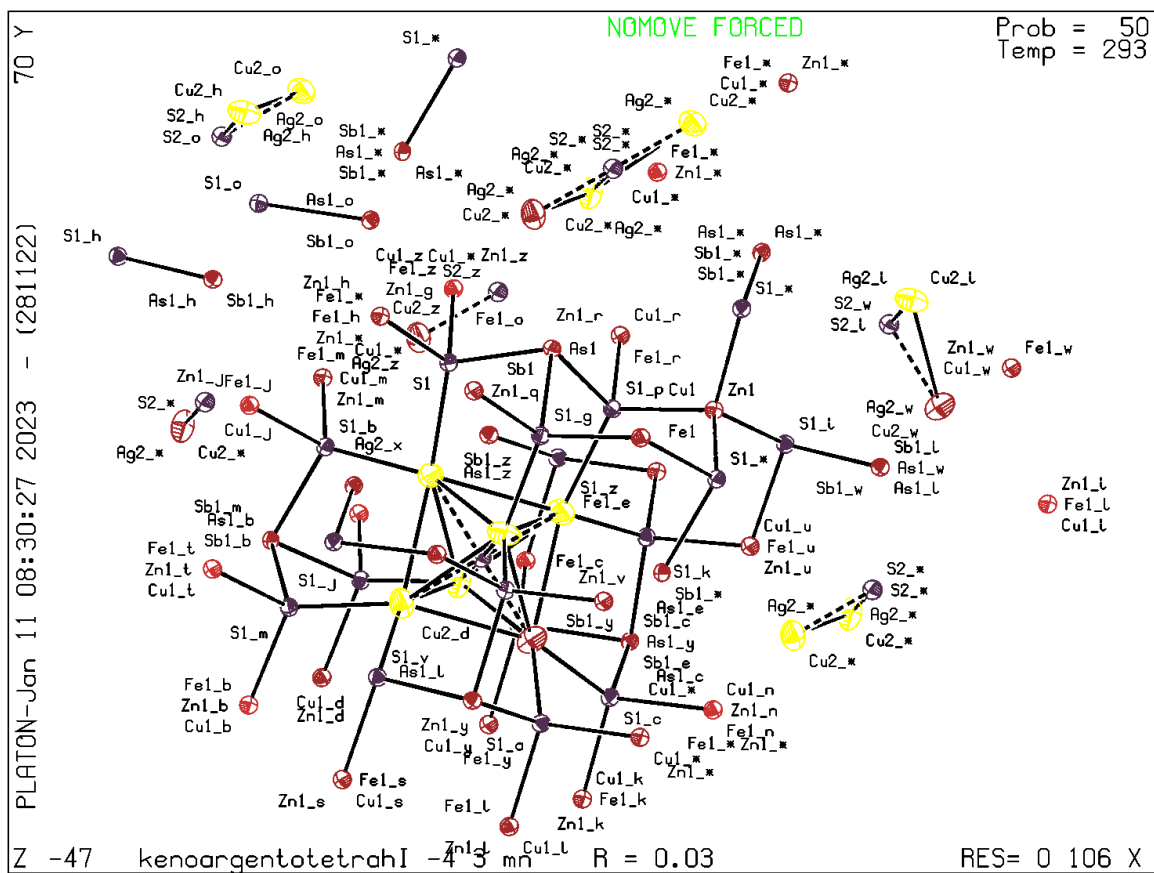

Supplement: Supplementary file 1 [file checkcif_kenoargentotetrahedrite-Zn (M2 non-splitting model).pdf › Supplement/checkcif_kenoargentotetrahedrite-Zn (M2 non-splitting model).pdf]
