# Supplementary material for: Kenoargentotetrahedrite-(Zn), [Ag6]4+(Cu4Zn2)Sb4S12□, a new member of the tetrahedrite group from the Yindongpo Au deposit, China
Source: Copernicus journal article supplement (doi:10.5194/ejm-36-397-2024), 2024-05-03

## checkCIF/PLATON report

You have not supplied any structure factors. As a result the full set of tests cannot be run.

THIS REPORT IS FOR GUIDANCE ONLY. IF USED AS PART OF A REVIEW PROCEDURE FOR PUBLICATION, IT SHOULD NOT REPLACE THE EXPERTISE OF AN EXPERIENCED CRYSTALLOGRAPHIC REFEREE.

No syntax errors found.      CIF dictionary      Interpreting this report

### Datablock: kenoargentotetrahedrite-zn

---

|                    |                                                                |                                                        |                           |
|--------------------|----------------------------------------------------------------|--------------------------------------------------------|---------------------------|
| Bond precision:    | = 0.0000 A                                                     | Wavelength=0.71073                                     |                           |
| Cell:              | a=10.4624 (4)<br>alpha=90                                      | b=10.4624 (4)<br>beta=90                               | c=10.4624 (4)<br>gamma=90 |
| Temperature:       | 293 K                                                          |                                                        |                           |
|                    | Calculated                                                     | Reported                                               |                           |
| Volume             | 1145.23 (13)                                                   | 1145.23 (13)                                           |                           |
| Space group        | I -4 3 m                                                       | I -4 3 m                                               |                           |
| Hall group         | I -4 2 3                                                       | I -4 2 3                                               |                           |
| Moiety formula     | Ag6.74 As0.58 Cu13.06<br>Fe1.80 S24 Sb7.42 Zn2.40,<br>0.876(S) | Ag3.371 As0.288 Cu6.529<br>Fe0.9 S12.438 Sb3.712 Zn1.2 |                           |
| Sum formula        | Ag6.74 As0.58 Cu13.06<br>Fe1.80 S24.88 Sb7.42 Zn2.40           | Ag3.38 As0.30 Cu6.53 Fe0.90<br>S12.43 Sb3.71 Zn1.20    |                           |
| Mr                 | 3559.27                                                        | 1779.22                                                |                           |
| Dx, g cm-3         | 5.161                                                          | 5.160                                                  |                           |
| Z                  | 1                                                              | 2                                                      |                           |
| Mu (mm-1)          | 16.345                                                         | 16.347                                                 |                           |
| F000               | 1610.0                                                         | 1610.0                                                 |                           |
| F000'              | 1608.60                                                        |                                                        |                           |
| h, k, lmax         | 13, 13, 13                                                     | 11, 10, 13                                             |                           |
| Nref               | 295 [ 170]                                                     | 294                                                    |                           |
| Tmin, Tmax         | 0.892, 0.922                                                   | 0.911, 1.000                                           |                           |
| Tmin'              | 0.892                                                          |                                                        |                           |
| Correction method= | # Reported T Limits: Tmin=0.911 Tmax=1.000                     |                                                        |                           |
| AbsCorr =          | MULTI-SCAN                                                     |                                                        |                           |
| Data completeness= | 1.73/1.00                                                      | Theta (max)= 28.235                                    |                           |

R(reflections)= 0.0247( 274)

wR2(reflections)=  
0.0389( 294)

S = 1.111

Npar= 22

---

The following ALERTS were generated. Each ALERT has the format

**test-name\_ALERT\_alert-type\_alert-level.**

Click on the hyperlinks for more details of the test.

---

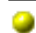

### Alert level C

ABSTY02\_ALERT\_1\_C An \_exptl\_absorpt\_correction\_type has been given without  
a literature citation. This should be contained in the  
\_exptl\_absorpt\_process\_details field.

Absorption correction given as multi-scan

PLAT041\_ALERT\_1\_C Calc. and Reported SumFormula Strings Differ Please Check

Calc: Ag3.37 As0.29 Cu6.53 Fe0.90 S12.44 Sb3.71 Zn1.20

Rep.: Ag3.38 As0.30 Cu6.53 Fe0.90 S12.43 Sb3.71 Zn1.

20

PLAT042\_ALERT\_1\_C Calc. and Reported MoietyFormula Strings Differ Please Check

Calc: Ag6.74 As0.58 Cu13.06 Fe1.80 S24 Sb7.42 Zn2.40, 0.876(S)

Rep.: Ag3.371 As0.288 Cu6.529 Fe0.9 S12.438 Sb3.712

Zn1.2

PLAT077\_ALERT\_4\_C Unitcell Contains Non-integer Number of Atoms .. Please Check

PLAT090\_ALERT\_3\_C Poor Data / Parameter Ratio (Zmax > 18) ..... 7.73 Note

---

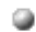

### Alert level G

FORMU01\_ALERT\_1\_G There is a discrepancy between the atom counts in the  
\_chemical\_formula\_sum and \_chemical\_formula\_moiety. This is  
usually due to the moiety formula being in the wrong format.

Atom count from \_chemical\_formula\_sum: Ag3.38 As0.3 Cu6.53 Fe0.9 S12

Atom count from \_chemical\_formula\_moiety: Ag3.371 As0.288 Cu6.529 Fe0.9

FORMU01\_ALERT\_2\_G There is a discrepancy between the atom counts in the

\_chemical\_formula\_sum and the formula from the \_atom\_site\* data.

Atom count from \_chemical\_formula\_sum: Ag3.38 As0.3 Cu6.53 Fe0.9 S12.43

Atom count from the \_atom\_site data: Ag3.372 As0.288 Cu6.528 Fe0.9 S1

CELLZ01\_ALERT\_1\_G Difference between formula and atom\_site contents detected.

CELLZ01\_ALERT\_1\_G ALERT: check formula stoichiometry or atom site occupancies.

From the CIF: \_cell\_formula\_units\_Z 2

From the CIF: \_chemical\_formula\_sum Ag3.38 As0.30 Cu6.53 Fe0.90 S12.43

TEST: Compare cell contents of formula and atom\_site data

| atom | Z*formula | cif sites | diff |
|------|-----------|-----------|------|
|------|-----------|-----------|------|

|    |      |      |      |
|----|------|------|------|
| Ag | 6.76 | 6.74 | 0.02 |
|----|------|------|------|

|    |      |      |      |
|----|------|------|------|
| As | 0.60 | 0.58 | 0.02 |
|----|------|------|------|

|    |       |       |      |
|----|-------|-------|------|
| Cu | 13.06 | 13.06 | 0.00 |
|----|-------|-------|------|

|    |      |      |       |
|----|------|------|-------|
| Fe | 1.80 | 1.80 | -0.00 |
|----|------|------|-------|

|   |       |       |       |
|---|-------|-------|-------|
| S | 24.86 | 24.88 | -0.02 |
|---|-------|-------|-------|

|    |      |      |       |
|----|------|------|-------|
| Sb | 7.42 | 7.42 | -0.00 |
|----|------|------|-------|

|    |      |      |      |
|----|------|------|------|
| Zn | 2.40 | 2.40 | 0.00 |
|----|------|------|------|

PLAT004\_ALERT\_5\_G Polymeric Structure Found with Maximum Dimension

2 Info

PLAT012\_ALERT\_1\_G No \_shelx\_res\_checksum Found in CIF .....

Please Check

PLAT017\_ALERT\_1\_G Check Scattering Type Consistency of M2A as

AG

PLAT017\_ALERT\_1\_G Check Scattering Type Consistency of M2B as

CU

PLAT045\_ALERT\_1\_G Calculated and Reported Z Differ by a Factor ...

0.500 Check

|                   |                                                     |      |             |
|-------------------|-----------------------------------------------------|------|-------------|
| PLAT168_ALERT_4_G | The CIF-Embedded .res File Contains EXYZ Records    | 2    | Report      |
| PLAT171_ALERT_4_G | The CIF-Embedded .res File Contains EADP Records    | 3    | Report      |
| PLAT199_ALERT_1_G | Reported _cell_measurement_temperature ..... (K)    | 293  | Check       |
| PLAT200_ALERT_1_G | Reported _diffraction_ambient_temperature ..... (K) | 293  | Check       |
| PLAT300_ALERT_4_G | Atom Site Occupancy of M1CU Constrained at          | 0.65 | Check       |
| PLAT300_ALERT_4_G | Atom Site Occupancy of M1ZN Constrained at          | 0.2  | Check       |
| PLAT300_ALERT_4_G | Atom Site Occupancy of M1FE Constrained at          | 0.15 | Check       |
| PLAT301_ALERT_3_G | Main Residue Disorder .....(Resd 1)                 | 81%  | Note        |
| PLAT302_ALERT_4_G | Anion/Solvent/Minor-Residue Disorder (Resd 2)       | 100% | Note        |
| PLAT720_ALERT_4_G | Number of Unusual/Non-Standard Labels .....         | 7    | Note        |
|                   | M2A M2B M1CU M1ZN M1FE X3SB X3AS                    |      |             |
| PLAT811_ALERT_5_G | No ADDSYM Analysis: Too Many Excluded Atoms ....    |      | ! Info      |
| PLAT883_ALERT_1_G | No Info/Value for _atom_sites_solution_primary .    |      | Please Do ! |
| PLAT950_ALERT_5_G | Calculated (ThMax) and CIF-Reported Hmax Differ     | 2    | Units       |
| PLAT951_ALERT_5_G | Calculated (ThMax) and CIF-Reported Kmax Differ     | 3    | Units       |

---

0 **ALERT level A** = Most likely a serious problem - resolve or explain  
 0 **ALERT level B** = A potentially serious problem, consider carefully  
 5 **ALERT level C** = Check. Ensure it is not caused by an omission or oversight  
 23 **ALERT level G** = General information/check it is not something unexpected

13 ALERT type 1 CIF construction/syntax error, inconsistent or missing data  
 1 ALERT type 2 Indicator that the structure model may be wrong or deficient  
 2 ALERT type 3 Indicator that the structure quality may be low  
 8 ALERT type 4 Improvement, methodology, query or suggestion  
 4 ALERT type 5 Informative message, check

---



---

It is advisable to attempt to resolve as many as possible of the alerts in all categories. Often the minor alerts point to easily fixed oversights, errors and omissions in your CIF or refinement strategy, so attention to these fine details can be worthwhile. In order to resolve some of the more serious problems it may be necessary to carry out additional measurements or structure refinements. However, the purpose of your study may justify the reported deviations and the more serious of these should normally be commented upon in the discussion or experimental section of a paper or in the "special\_details" fields of the CIF. checkCIF was carefully designed to identify outliers and unusual parameters, but every test has its limitations and alerts that are not important in a particular case may appear. Conversely, the absence of alerts does not guarantee there are no aspects of the results needing attention. It is up to the individual to critically assess their own results and, if necessary, seek expert advice.

### **Publication of your CIF in IUCr journals**

A basic structural check has been run on your CIF. These basic checks will be run on all CIFs submitted for publication in IUCr journals (*Acta Crystallographica*, *Journal of Applied Crystallography*, *Journal of Synchrotron Radiation*); however, if you intend to submit to *Acta Crystallographica Section C* or *E* or *IUCrData*, you should make sure that full publication checks are run on the final version of your CIF prior to submission.

### **Publication of your CIF in other journals**

Please refer to the *Notes for Authors* of the relevant journal for any special instructions relating to CIF submission.

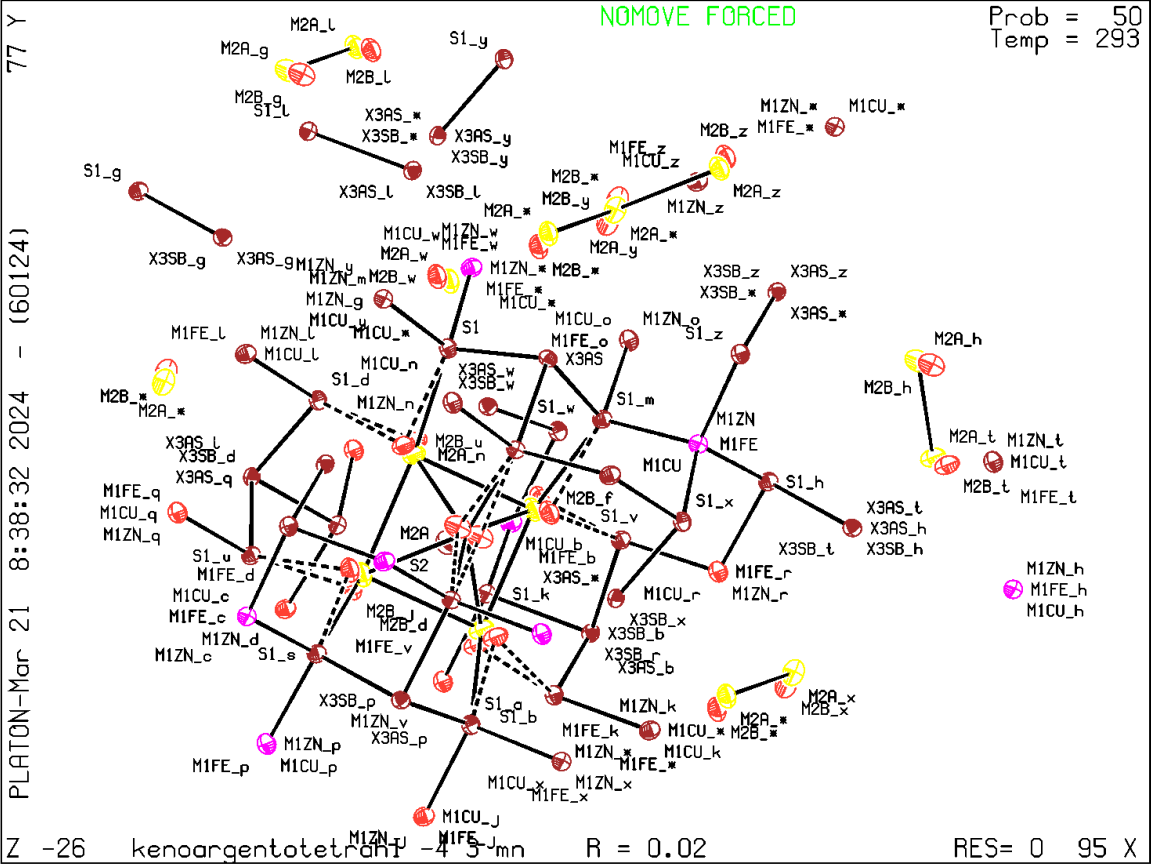

Supplement: Supplementary file 2 [file checkcif_kenoargentotetrahedrite-Zn (M2 splitting model).pdf › Supplement/checkcif_kenoargentotetrahedrite-Zn (M2 splitting model).pdf]
