# Supplementary material for: Kenoargentotetrahedrite-(Zn), [Ag6]4+(Cu4Zn2)Sb4S12□, a new member of the tetrahedrite group from the Yindongpo Au deposit, China
Source: Copernicus journal article supplement (doi:10.5194/ejm-36-397-2024), 2024-05-03
Supplement: Supplementary file [file ejm-36-397-2024-supplement-title-page.pdf › ejm-36-397-2024-supplement-title-page.pdf]

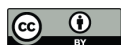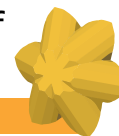

*Supplement of*

**Kenoargentotetrahedrite-(Zn),  $[\text{Ag}_6]^{4+}(\text{Cu}_4\text{Zn}_2)\text{Sb}_4\text{S}_{12}\square$ , a new member of the tetrahedrite group from the Yindongpo Au deposit, China**

Kai Qu et al.

*Correspondence to:* Kai Qu ([qukai\\_tcgs@foxmail.com](mailto:qukai_tcgs@foxmail.com)) and Yanjuan Wang ([wangyanjuan\\_cugb@foxmail.com](mailto:wangyanjuan_cugb@foxmail.com))

- [ejm-36-397-2024-supplement-title-page.pdf](#)
- Supplement
  - [Table S1-S5.docx](#)
  - [checkcif\\_kenoargentotetrahedrite-Zn \(M2 non-splitting model\).pdf](#)
  - [checkcif\\_kenoargentotetrahedrite-Zn \(M2 splitting model\).pdf](#)
  - [kenoargentotetrahedrite-Zn \(M2 non-splitting model\).cif](#)
  - [kenoargentotetrahedrite-Zn \(M2 splitting model\).cif](#)

The copyright of individual parts of the supplement might differ from the article licence.
